# Supplementary material for: Lipid droplet membrane proteome remodeling parallels ethanol-induced hepatic steatosis and its resolution
Source: PubMed Central journal article supplement (PMC8010705; doi:10.1016/j.jlr.2021.100049), 2021-02-20
Supplement: mmc1.pdf [file mmc1.pdf]

# Supplementary Fig 1.

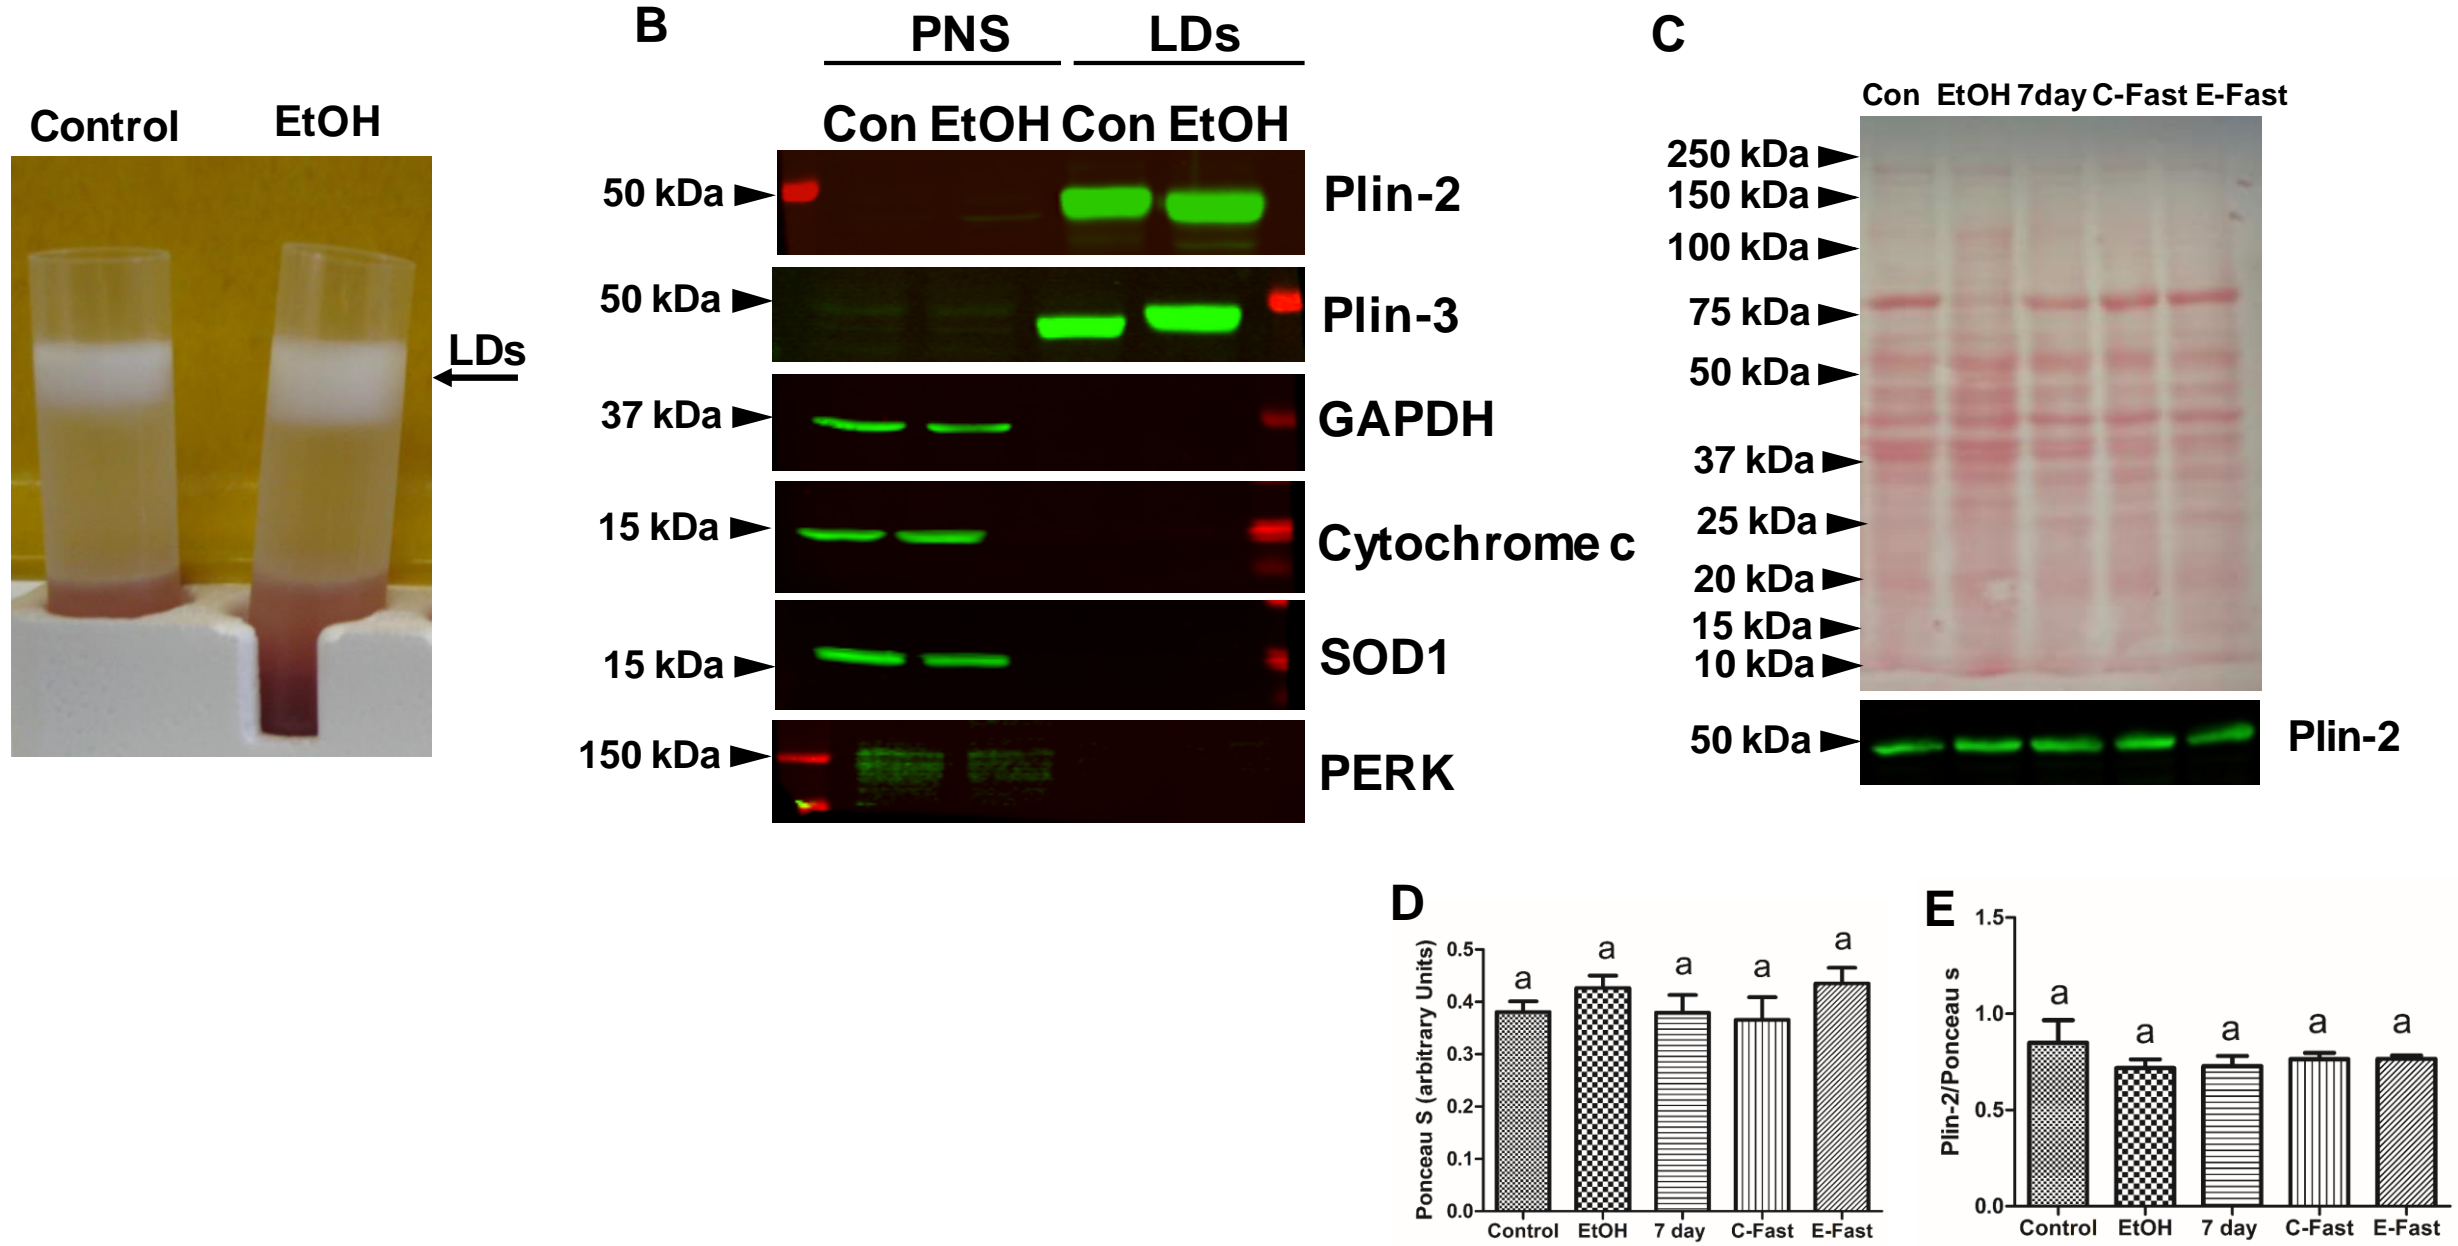

**S Fig 1. Purification and quantification of lipid droplet membrane proteins.** (A) Representative image showing buoyant lipid droplets (LDs) after gradient centrifugation of post nuclear supernatants (PNS) obtained from the livers of control and ethanol-fed rats (B) Representative Western blot show absence of common contaminating proteins such as cytosol (GAPDH), mitochondria (Cytochrome C and Super Oxide dismutase (SOD1) and endoplasmic reticulum (protein kinase RNA-like endoplasmic reticulum kinase (PERK)) in LDs isolated from control and ethanol-fed groups (C) ponceau S staining and Western blotting show protein bands and PLIN-2 levels, respectively, in equal protein loaded LD fractions from different groups (D) densitometry quantification of ponceau S staining and (E) PLIN-2 levels after normalization with ponceau S staining in each group. Data are mean values of  $\pm$  S.E.M. of 4 to 6 animals per group. Bars sharing different letters are significantly different. Bars sharing the same letter are not significantly different,  $P \leq 0.05$ .

Supplementary Fig 2.

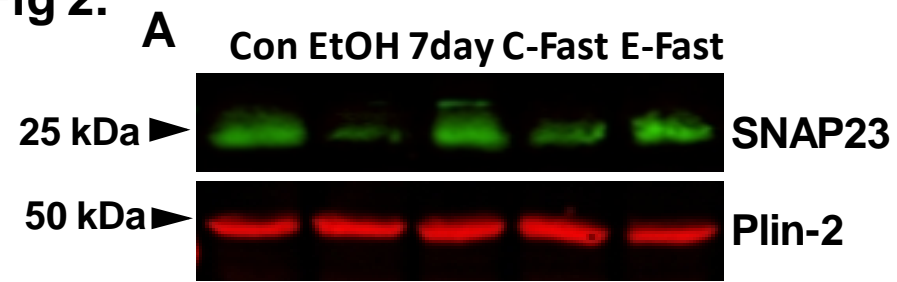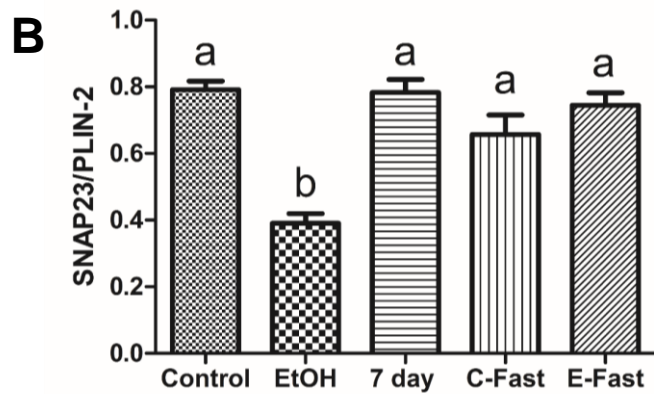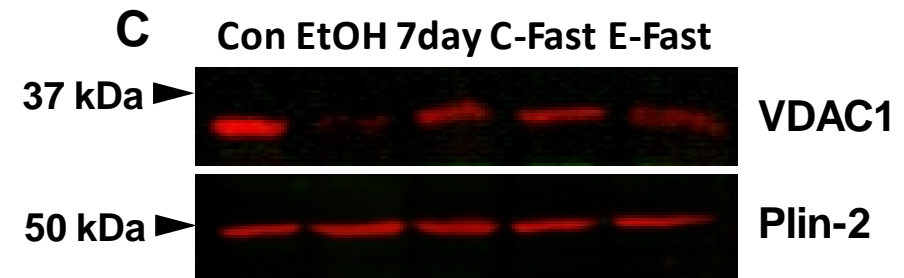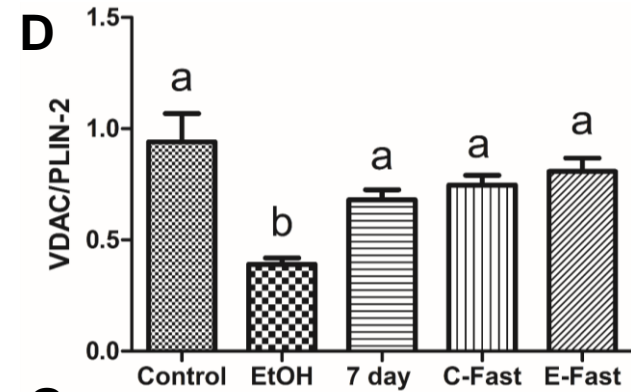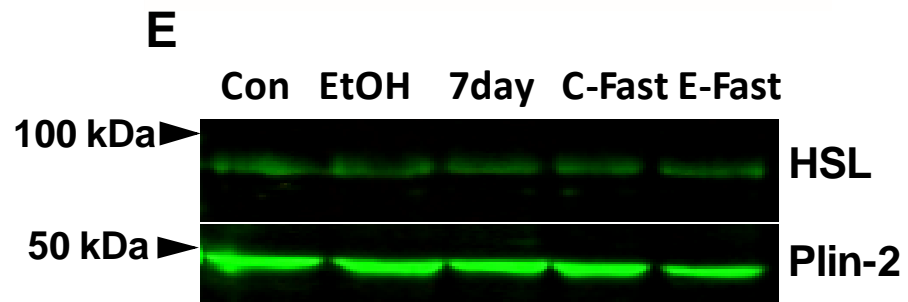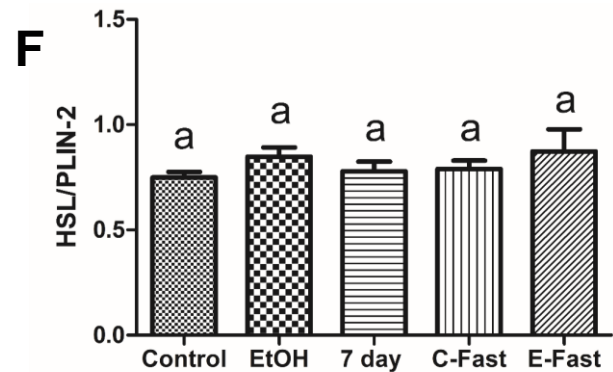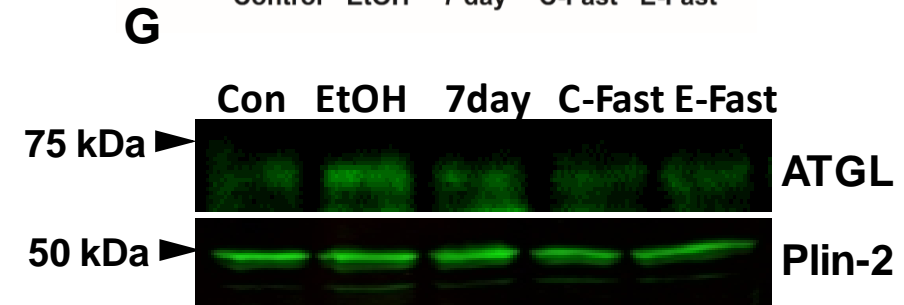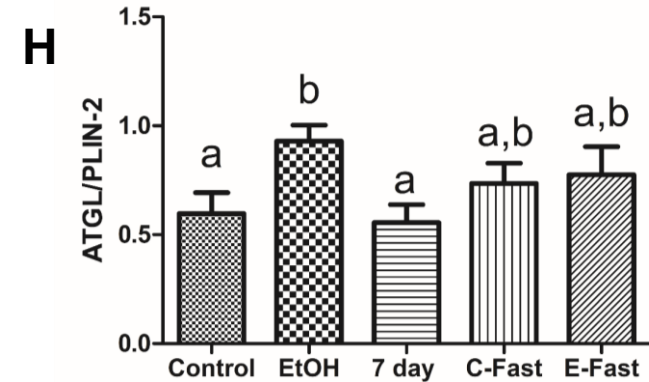

**S Fig 2. Expression of select lipid droplet membrane proteins.** (A) Representative Western blot and densitometry quantification of (A&B) Synaptosomal-associated protein 23 (SNAP23) (C&D) Voltage-dependent anion channel (VDAC1) (E&F) Hormone sensitive lipase (HSL) and (G&H) Adipose tissue triglyceride lipase (ATGL) in LDs from different experimental groups. Data are mean values of  $\pm$  S.E.M. of 4 to 6 animals per group. Bars sharing different letters are significantly different. Bars sharing the same letter are not significantly different,  $P \leq 0.05$ .
